# Supplementary material
Source: PubMed Central journal article supplement (PMC6580450)
Supplement: jamapediatr-173-770-s001.pdf [file jamapediatr-173-770-s001.pdf]

## Supplementary Online Content

Mori C, Temple JR, Browne D, Madigan S. Association of sexting with sexual behaviors and mental health among adolescents: a systematic review and meta-analysis. *JAMA Pediatr*. Published online June 17, 2019. doi:10.1001/jamapediatrics.2019.1658

**eTable 1.** Search Strategy

**eTable 2.** Study Quality Scoring for Each Study Included in the Meta-analysis

**eReferences.**

This supplementary material has been provided by the authors to give readers additional information about their work.

**eTable 1. Search Strategy**

|                         |                                                                                                                                                                      |
|-------------------------|----------------------------------------------------------------------------------------------------------------------------------------------------------------------|
| <b>Database:</b>        | MEDLINE, EMBASE, Web of Science, PsycINFO <1806 to April 2018>                                                                                                       |
| <b>Search Strategy:</b> |                                                                                                                                                                      |
| 1                       | ((cyber or internet or online) adj6 pornograph*).mp.                                                                                                                 |
| 2                       | (sex* adj6 explicit* adj6 (media or image*)).mp.                                                                                                                     |
| 3                       | (sext or sexting).mp.                                                                                                                                                |
| 4                       | (nude adj4 (photo or photos or photograph* or picture*)).mp.                                                                                                         |
| 5                       | (cell adj4 phone* adj8 (photo or photos or photograph* or picture*)).mp.                                                                                             |
| 6                       | (suggestive adj (image* or photo or photos or photograph* or picture*)).mp.                                                                                          |
| 7                       | cybersex/                                                                                                                                                            |
| 8                       | 1 or 2 or 3 or 4 or 5 or 6 or 7                                                                                                                                      |
| 9                       | limit 8 to (100 childhood <birth to age 12 yrs> or 180 school age <age 6 to 12 yrs> or 200 adolescence <age 13 to 17 yrs> or 320 young adulthood <age 18 to 29 yrs>) |
| 10                      | (teen* or adolescen* or youth* or child* or girl* or boy* or "young people" or "high school*" or student*).mp.                                                       |
| 11                      | 8 and 10                                                                                                                                                             |
| 12                      | 9 or 11                                                                                                                                                              |
| 13                      | limit 12 to yr="2000 - Current"                                                                                                                                      |

**eTable 2.** Study Quality Scoring for Each Study Included in the Meta-analysis

| <b>Study</b>                          | <b>Defined Sample</b> | <b>Representative Sample</b> | <b>Controls in Analysis</b> | <b>Predictors Measured</b> | <b>Completion Rate</b> | <b>Demographic Info.</b> | <b>Definition Provided</b> | <b>Sexting Details</b> | <b>Published Study</b> | <b>Total /9</b> |
|---------------------------------------|-----------------------|------------------------------|-----------------------------|----------------------------|------------------------|--------------------------|----------------------------|------------------------|------------------------|-----------------|
| Amoo (2013) <sup>1</sup>              | Y                     | Y                            | Y                           | Y                          | Y                      | Y                        | N                          | N                      | N                      | 6               |
| Brinkley (2017) <sup>2</sup>          | Y                     | N                            | Y                           | Y                          | Y                      | Y                        | Y                          | N                      | Y                      | 7               |
| Dake (2012) <sup>3</sup>              | Y                     | Y                            | Y                           | Y                          | Y                      | Y                        | N                          | Y                      | Y                      | 8               |
| Dowdell (2017) <sup>4</sup>           | N                     | N                            | N                           | Y                          | N                      | N                        | N                          | N                      | Y                      | 2               |
| Englander (2012) <sup>5</sup>         | N                     | N                            | N                           | Y                          | N                      | N                        | N                          | Y                      | N                      | 2               |
| Frankel (2018) <sup>5</sup>           | Y                     | Y                            | Y                           | Y                          | Y                      | Y                        | Y                          | N                      | Y                      | 8               |
| Houck (2014) <sup>7</sup>             | Y                     | N                            | Y                           | Y                          | N                      | Y                        | Y                          | Y                      | Y                      | 7               |
| Lee (2016) <sup>8</sup>               | Y                     | Y                            | Y                           | Y                          | Y                      | Y                        | Y                          | N                      | Y                      | 8               |
| MacDonald (2018) <sup>9</sup>         | Y                     | Y                            | Y                           | Y                          | N                      | Y                        | Y                          | N                      | Y                      | 7               |
| Mark (2014) <sup>10</sup>             | N                     | N                            | Y                           | Y                          | N                      | N                        | N                          | N                      | N                      | 2               |
| Morelli (2017) <sup>11</sup>          | Y                     | N                            | Y                           | Y                          | N                      | Y                        | Y                          | N                      | Y                      | 6               |
| Patrick (2015) <sup>12</sup>          | Y                     | Y                            | Y                           | Y                          | Y                      | Y                        | Y                          | Y                      | Y                      | 9               |
| Rice (2014) <sup>13</sup>             | Y                     | Y                            | Y                           | Y                          | Y                      | Y                        | Y                          | N                      | Y                      | 8               |
| Rice (2018) <sup>14</sup>             | Y                     | Y                            | Y                           | Y                          | Y                      | Y                        | Y                          | N                      | Y                      | 8               |
| Romo (2017) <sup>15</sup>             | Y                     | N                            | Y                           | Y                          | Y                      | Y                        | N                          | N                      | Y                      | 6               |
| Schloms-Madlener (2013) <sup>16</sup> | Y                     | N                            | N                           | Y                          | Y                      | Y                        | Y                          | Y                      | N                      | 6               |
| Sevcíková (2016) <sup>17</sup>        | Y                     | Y                            | Y                           | Y                          | Y                      | Y                        | Y                          | N                      | Y                      | 8               |

| Study                            | Defined Sample | Representative Sample | Controls in Analysis | Predictors Measured | Completion Rate | Demographic Info.   | Definition Provided | Sexting Details | Published Study | Total /9 |
|----------------------------------|----------------|-----------------------|----------------------|---------------------|-----------------|---------------------|---------------------|-----------------|-----------------|----------|
| Speno (2016) <sup>18</sup>       | Y              | N                     | Y                    | Y                   | N               | Y                   | Y                   | N               | N               | 5        |
| Temple (2012) <sup>19</sup>      | Y              | N                     | N                    | Y                   | Y               | Y                   | Y                   | Y               | Y               | 7        |
| Temple (2014) <sup>20</sup>      | Y              | N                     | Y                    | Y                   | Y               | Y                   | Y                   | N               | Y               | 7        |
| Titchen (2018) <sup>21</sup>     | Y              | N                     | Y                    | Y                   | N               | Y                   | Y                   | N               | Y               | 6        |
| Tomić (2018) <sup>22</sup>       | Y              | N                     | Y                    | Y                   | Y               | Y                   | N                   | N               | Y               | 6        |
| Van Ouytsel (2014) <sup>23</sup> | Y              | N                     | Y                    | Y                   | N               | Y                   | Y                   | N               | Y               | 6        |
| West (2014) <sup>24</sup>        | Y              | N                     | Y                    | Y                   | Y               | Y                   | Y                   | N               | Y               | 7        |
| Woodward (2017) <sup>25</sup>    | N              | Y                     | Y                    | Y                   | Y               | Y                   | Y                   | Y               | Y               | 8        |
| Ybarra (2014) <sup>26</sup>      | Y              | Y                     | Y                    | Y                   | Y               | Y                   | Y                   | Y               | Y               | 9        |
| <b>Total (N = 23)</b>            |                |                       |                      |                     |                 |                     |                     |                 |                 |          |
| Criteria                         | N (%)          |                       | Criteria             | N (%)               |                 | Criteria            | N (%)               |                 |                 |          |
| Defined Sample                   |                |                       | Predictors Measured  |                     |                 | Definition Provided |                     |                 |                 |          |
| Yes                              | 22 (84.6)      |                       | Yes                  | 26 (100)            |                 | Yes                 | 19 (73.1)           |                 |                 |          |
| No                               | 4 (15.4)       |                       | No                   | 0 (0)               |                 | No                  | 7 (26.9)            |                 |                 |          |
| Representativeness               |                |                       | Completion Rate      |                     |                 | Sexting Details     |                     |                 |                 |          |
| Yes                              | 11 (42.3)      |                       | Yes                  | 17 (65.4)           |                 | Yes                 | 8 (30.8)            |                 |                 |          |
| No                               | 15 (57.7)      |                       | No                   | 9 (34.6)            |                 | No                  | 18 (69.2)           |                 |                 |          |
| Controls in Analysis             |                |                       | Demographic Info     |                     |                 | Published Study     |                     |                 |                 |          |
| Yes                              | 22 (84.6)      |                       | Yes                  | 23 (88.5)           |                 | Yes                 | 21 (80.8)           |                 |                 |          |
| No                               | 4 (15.4)       |                       | No                   | 3 (11.5)            |                 | No                  | 5 (19.2)            |                 |                 |          |

Legend: The individual quality score items are summed to generate a total score for each study. Total scores range from 0 to 9. Articles were given a score of 0 ("No") or 1 ("Yes") for each criterion and summed to give a total score out of 9. The classification system used identified studies of low ( $\leq 2$ ), moderate (3-5), or high quality ( $\geq 6$ ). The average study quality score was 6.5. Three studies (11.5%)<sup>4,5,10</sup> fell in the low quality range, 1 study in the moderate (3.8%), and the remaining 22 studies (84.6%) fell in the high quality range. The three studies deemed to have low methodological quality were removed from analyses. Y = Yes; N = No  
For additional information on scoring criteria, refer to eTable 1 in Madigan et al., 2018.<sup>27</sup>

## eReferences

1. Amoo EO, Adetoro G, Olawole-Isaac A. Effects of adolescents exposure to sexual contents on social media in Nigeria. Paper presented at: 22nd International Business Information Management Conference (IBIMA); November 13-14, 2013; Rome, Italy.
2. Brinkley DY, Ackerman RA, Ehrenreich SE, Underwood MK. Sending and receiving text messages with sexual content: relations with early sexual activity and borderline personality features in late adolescence. *Comput Human Behav.* 2017;70:119-130.
3. Dake JA, Price JH, Maziarz L, Ward B. Prevalence and correlates of sexting behavior in adolescents. *Am J Sex Educ.* 2012;7(1):1-15.
4. Dowdell EB. Self exploitation behaviors and sexting among high school students. *Nurs Res.* 2017;66(2):E134.
5. Englander E. *Low risk associated with most teenage sexting: A study of 617 18-year-olds.* Virtual Commons - Bridgewater State University 2012.
6. Frankel AS, Bass SB, Patterson F, Dai T, Brown D. Sexting, risk behavior, and mental health in adolescents: an examination of 2015 Pennsylvania Youth Risk Behavior Survey data. *J Sch Health.* 2018;88(3):190-199.
7. Houck CD, Barker D, Rizzo C, Hancock E, Norton A, Brown LK. Sexting and sexual behavior in at-risk adolescents. *Pediatrics.* 2014;133(2):e276-e282.
8. Lee C-H, Moak S, Walker JT. Effects of self-control, social control, and social learning on sexting behavior among South Korean youths. *Youth Soc.* 2016;48(2):242-264.
9. MacDonald K, Imburgia TM, Auerswald C, Ott MA. Sexting among Adolescent Urban Males. *J Adolesc Health.* 2018;62(2):S126.
10. Mark K, Longinaker N, Collinetti E, Lowe S, Husman C, Terplan M. Gender differences in sexting behaviors among chlamydia positive adolescents and young adults. *J Adolesc Health.* 2014;54(2):S52.
11. Morelli M, Bianchi D, Baiocco R, Pezzuti L, Chirumbolo A. Sexting behaviors and cyber pornography addiction among adolescents: the moderating role of alcohol consumption. *Sex Res Social Policy.* 2017;14(2):113-121.
12. Patrick K, Heywood W, Pitts MK, Mitchell A. Demographic and behavioural correlates of six sexting behaviours among Australian secondary school students. *Sexual health.* 2015;12(6):480-487.
13. Rice E, Gibbs J, Winetrobe H, et al. Sexting and sexual behavior among middle school students. *Pediatrics.* 2014;134(1):e21.
14. Rice E, Craddock J, Hemler M, et al. Associations between sexting behaviors and sexual behaviors among mobile phone-owning teens in Los Angeles. *Child Dev.* 2018;89(1):110-117.
15. Romo DL, Garnett C, Younger AP, et al. Social media use and its association with sexual risk and parental monitoring among a primarily Hispanic adolescent population. *J Pediatr Adolesc Gynecol.* 2017;30(4):466-473.
16. Schloms-Madlener KC. *The prevalence and characteristics of sexting behaviours among adolescents and adults in Cape Town, South Africa* [dissertation]. University of Cape Town; 2013.
17. Ševčíková A. Girls' and boys' experience with teen sexting in early and late adolescence. *J Adolesc.* 2016;51:156-162.
18. Speno AG. *Adolescent sexting: an examination of the psychosocial contributions to the creation and sharing of sexual images* [dissertation]. University of Missouri-Columbia; 2016.
19. Temple JR, Paul JA, van den Berg P, Le VD, McElhany A, Temple BW. Teen sexting and its association with sexual behaviors. *Arch Pediatr Adolesc Med.* 2012;166(9):828-833.
20. Temple JR, Le VD, van Den Berg P, Ling Y, Paul JA, Temple BW. Brief report: Teen sexting and psychosocial health. *J Adolesc.* 2014;37(1):33-36.

21. Titchen KE, Maslyanskaya S, Silver EJ, Coupey SM. Sexting and adolescent girls: associations with sexual activity and abuse. *J Adolesc Health*. 2018;62(2):S62.
22. Tomić I, Burić J, Štulhofer A. Associations between Croatian adolescents' use of sexually explicit material and sexual behavior: does parental monitoring play a role? *Arch Sex Behav*. 2018;47(6):1881-1893.
23. Van Ouytsel J, Van Gool E, Ponnet K, Walrave M. Brief report: the association between adolescents' characteristics and engagement in sexting. *J Adolesc*. 2014;37(8):1387-1391.
24. West JH, Lister CE, Hall PC, et al. Sexting among Peruvian adolescents. *BMC Public Health*. 2014;14(1):811.
25. Woodward VH, Evans M, Brooks M. Social and psychological factors of rural youth sexting: an examination of gender-specific models. *Deviant Behav*. 2017;38(4):461-476.
26. Ybarra ML, Mitchell KJ. "Sexting" and its relation to sexual activity and sexual risk behavior in a national survey of adolescents. *J Adolesc Health*. 2014;55(6):757-764.
27. Madigan S, Ly A, Rash CL, Van Ouytsel J, Temple JR. Prevalence of multiple forms of sexting behavior among youth: a systematic review and meta-analysis. *JAMA Pediatr*. 2018;172(4):327-335.
